# Supplementary material for: Dietary Strategies to Modulate the Health Condition and Immune Responses in Gilthead Seabream (Sparus aurata) Juveniles Following Intestinal Inflammation
Source: MDPI journal article supplement (doi:10.3390/ani12213019), 2022-11-03
Supplement: s1 [file s1]

**Table S1:** Intestinal gene expression profiles of gilthead seabream after the feeding and inflammatory trials. **CTRL** (control diet), **BG** ( $\beta$ -glucans diet), **CUR** (curcumin diet), **CTRL-D** (control diet + dextran sodium sulphate - DSS), **BG-D** ( $\beta$ -glucans diet + DSS), **CUR-D** (curcumin diet + DSS). Values are presented as means  $\pm$  standard deviation. Different letters mean significant differences among dietary treatments ( $p < 0.05$ ).

| Gene expression | Feeding trial       |   |        |                      |   |        | Inflammatory trial  |   |        |                     |   |        |                      |   |        |                      |   |        |                      |   |        |
|-----------------|---------------------|---|--------|----------------------|---|--------|---------------------|---|--------|---------------------|---|--------|----------------------|---|--------|----------------------|---|--------|----------------------|---|--------|
|                 | CTRL                |   |        | BG                   |   |        | CUR                 |   |        | CTRL                |   |        | CTRL-D               |   |        | BG-D                 |   |        | CUR-D                |   |        |
| <i>sod</i>      | 0.0383              | ± | 0.0150 | 0.0412               | ± | 0.0161 | 0.0367              | ± | 0.0218 | 0.0434 <sup>a</sup> | ± | 0.0162 | 0.0294 <sup>ab</sup> | ± | 0.0200 | 0.0197 <sup>b</sup>  | ± | 0.0104 | 0.0333 <sup>ab</sup> | ± | 0.0161 |
| <i>gpx</i>      | 0.0108              | ± | 0.0060 | 0.0111               | ± | 0.0056 | 0.0110              | ± | 0.0086 | 0.0049              | ± | 0.0040 | 0.0033               | ± | 0.0023 | 0.0024               | ± | 0.0012 | 0.0037               | ± | 0.0023 |
| <i>tnfa</i>     | 0.0033 <sup>b</sup> | ± | 0.0009 | 0.0039 <sup>ab</sup> | ± | 0.0009 | 0.0060 <sup>a</sup> | ± | 0.0036 | 0.0034              | ± | 0.0020 | 0.0019               | ± | 0.0010 | 0.0028               | ± | 0.0021 | 0.0020               | ± | 0.0016 |
| <i>il10</i>     | 0.0001              | ± | 0.0001 | 0.0001               | ± | 0.0001 | 0.0001              | ± | 0.0000 | 0.0001              | ± | 0.0001 | 0.0001               | ± | 0.0000 | 0.0000               | ± | 0.0000 | 0.0001               | ± | 0.0000 |
| <i>igm</i>      | 0.0581              | ± | 0.0593 | 0.0352               | ± | 0.0290 | 0.0416              | ± | 0.0649 | 0.0537              | ± | 0.0424 | 0.0232               | ± | 0.0116 | 0.0255               | ± | 0.0160 | 0.0261               | ± | 0.0225 |
| <i>csf1r</i>    | 0.0002 <sup>b</sup> | ± | 0.0001 | 0.0003 <sup>ab</sup> | ± | 0.0002 | 0.0004 <sup>a</sup> | ± | 0.0002 | 0.0003 <sup>a</sup> | ± | 0.0001 | 0.0002 <sup>b</sup>  | ± | 0.0001 | 0.0002 <sup>ab</sup> | ± | 0.0001 | 0.0002 <sup>ab</sup> | ± | 0.0001 |
| <i>cd8a</i>     | 0.0141              | ± | 0.0089 | 0.0121               | ± | 0.0056 | 0.0112              | ± | 0.0050 | 0.0131              | ± | 0.0115 | 0.0060               | ± | 0.0020 | 0.0075               | ± | 0.0037 | 0.0088               | ± | 0.0046 |
| <i>hsp70</i>    | 0.2583              | ± | 0.0703 | 0.3213               | ± | 0.0886 | 0.4105              | ± | 0.2658 | 0.3349              | ± | 0.2583 | 0.1604               | ± | 0.0711 | 0.2074               | ± | 0.1460 | 0.2976               | ± | 0.1910 |
| <i>ocln</i>     | 0.0146              | ± | 0.0045 | 0.0233               | ± | 0.0082 | 0.0242              | ± | 0.0157 | 0.0116              | ± | 0.0092 | 0.0068               | ± | 0.0050 | 0.0060               | ± | 0.0036 | 0.0089               | ± | 0.0044 |
| <i>hep</i>      | 0.3523 <sup>b</sup> | ± | 0.2303 | 0.6998 <sup>ab</sup> | ± | 0.4985 | 1.0486 <sup>a</sup> | ± | 0.7749 | 0.3716              | ± | 0.3151 | 0.4004               | ± | 0.3432 | 0.1642               | ± | 0.1878 | 0.3237               | ± | 0.2378 |
| <i>muc13</i>    | 0.2820              | ± | 0.1098 | 0.2894               | ± | 0.1285 | 0.2659              | ± | 0.1237 | 0.2385              | ± | 0.1451 | 0.1520               | ± | 0.1272 | 0.1766               | ± | 0.1094 | 0.1776               | ± | 0.0908 |
| <i>muc2</i>     | 0.0488              | ± | 0.0190 | 0.0482               | ± | 0.0229 | 0.0447              | ± | 0.0312 | 0.0260              | ± | 0.0173 | 0.0108               | ± | 0.0059 | 0.0220               | ± | 0.0138 | 0.0207               | ± | 0.0107 |
